# Supplementary material for: Supported sub-5nm Pt–Fe intermetallic compounds for electrocatalytic application
Source: Royal Society of Chemistry journal article supplement (doi:10.1039/c2jm16504j), 2012-01-01
Supplement: c2jm16504j.pdf [file c2jm16504j.pdf]

Supplementary Information:

## Supported Sub-5nm Pt-Fe Intermetallic Compounds for

### Electrocatalytic Application

Xiang Li,<sup>a</sup> Li An,<sup>a</sup> Xiayan Wang,<sup>a</sup> Fan Li,<sup>a</sup> Ruqiang Zou<sup>b</sup> and Dingguo Xia<sup>\*b</sup>

<sup>a</sup> College of Environmental and Energy Engineering, Beijing University of Technology, Beijing 100124, PR China

<sup>b</sup> College of Engineering, Peking University, Beijing 100871, PR China

\*dgxia@pku.edu.cn

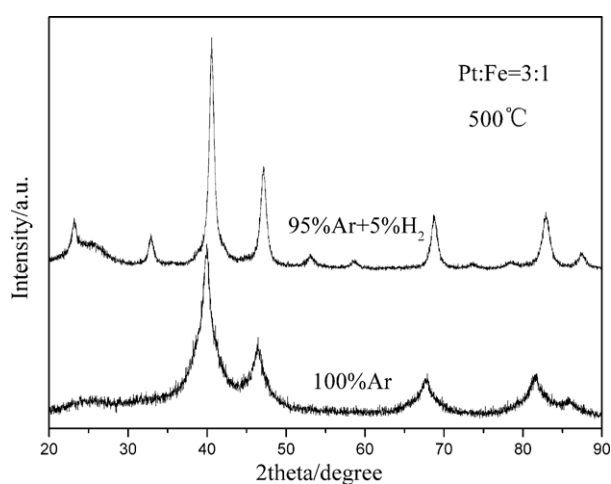

**Figure S1.** Powder XRD patterns of as-prepared Pt<sub>3</sub>Fe<sub>1</sub>/C annealed under inert and reducing atmosphere.

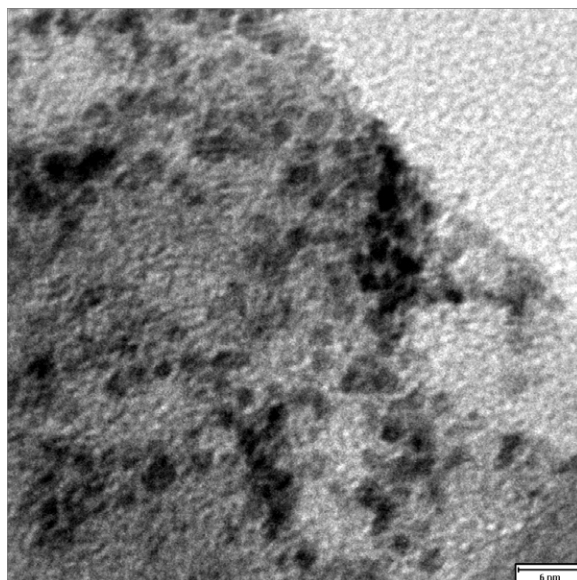

**Figure S2.** TEM images of typical as-synthesized supported chemically disordered FCC structure Pt-Fe nanoparticles

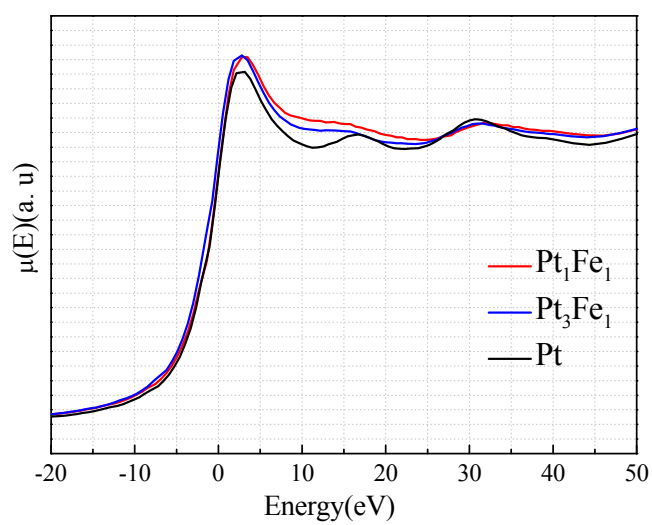

**Figure S3.** Normalised Pt L<sub>3</sub>-edge XANES spectra of Pt, Pt<sub>3</sub>Fe<sub>1</sub>/C and Pt<sub>1</sub>Fe<sub>1</sub>/C. Pt L<sub>3</sub>:11564eV

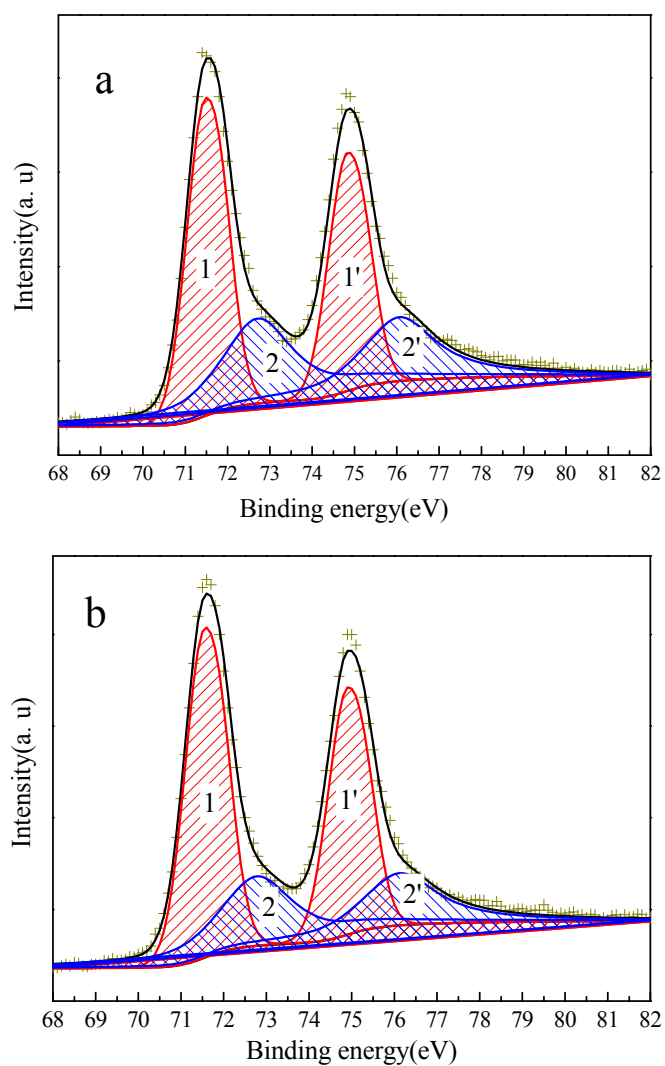

**Figure S4.** Pt 4f core level spectrum of a)Pt<sub>3</sub>Fe<sub>1</sub>/C; b)Pt<sub>1</sub>Fe<sub>1</sub>/C. The doublet peaks (labelled 1 and 1') are generated by photoelectrons emitted from Pt(0) and the other doublet peaks (labelled 2 and 2') are generated by photoelectrons emitted from Pt(II).

**Table S1.** XPS analysis of Pt<sub>3</sub>Fe<sub>1</sub>/C and Pt<sub>1</sub>Fe<sub>1</sub>/C.

| Electrocatalyst                    | Species | Binding energy of 4f <sub>7/2</sub> /eV | Relative intensity/% |
|------------------------------------|---------|-----------------------------------------|----------------------|
| Pt <sub>3</sub> Fe <sub>1</sub> /C | Pt(0)   | 71.5                                    | 59                   |
|                                    | Pt(II)  | 72.8                                    | 41                   |
| Pt <sub>1</sub> Fe <sub>1</sub> /C | Pt(0)   | 71.5                                    | 65                   |
|                                    | Pt(II)  | 72.7                                    | 35                   |
